# Supplementary material for: Rupture Forces among Human Blood Platelets at different Degrees of Activation
Source: PubMed Central journal article supplement (PMC4857101; doi:10.1038/srep25402), 2016-05-05
Supplement: srep25402-s1.pdf [file srep25402-s1.pdf]

# Supplementary Information

## **Rupture Forces among Human Blood Platelets at different Degrees of Activation**

Thi-Huong Nguyen,<sup>1,2,\*</sup> Raghavendra Palankar,<sup>1,2</sup> Van-Chien Bui,<sup>1,2</sup> Nikolay Medvedev,<sup>1</sup>  
Andreas Greinacher,<sup>2\*</sup> and Mihaela Delcea<sup>1,2,\*</sup>

<sup>1</sup>*Nanostructure Group, ZIK HIKE - Center for Innovation Competence, Humoral Immune Reactions in Cardiovascular Diseases, University of Greifswald, 17489 Greifswald, Germany.*

<sup>2</sup>*Institute for Immunology and Transfusion Medicine, University Medicine Greifswald, 17475 Greifswald, Germany*

*E-mail:* thihuong.nguyen@uni-greifswald.de; greinach@uni-greifswald.de; delceam@uni-greifswald.de

**Supplementary Figure 1. SEM images of platelets on material-passivated substrates at different surface-contact time.**

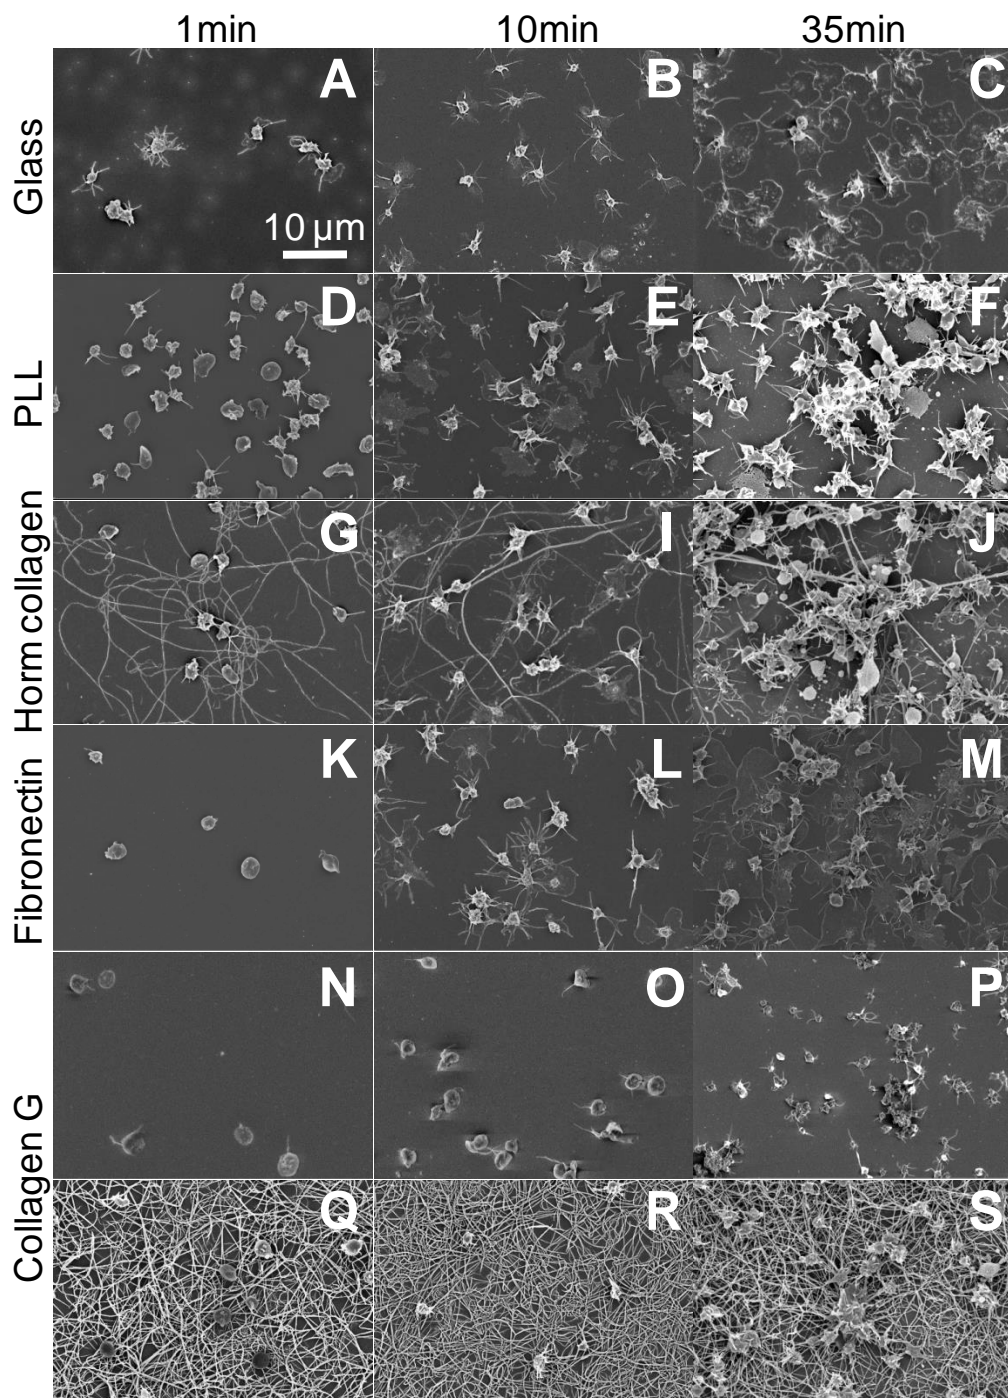

At each time point, platelets spread strongest on glass (A-C), PLL (D-F), and Horm collagen (G-J), weaker on fibronectin (K-M) and weakest on collagen G (N-S). At lower surface roughness (N-P), platelets seem to be spreading less on collagen G than that at higher surface roughness (Q-S). Thin filopodial extensions and irregular shapes are characteristics of activated platelets. Scale bar corresponds to 10 μm for all images.

**Supplementary Figure 2. Platelet aggregation induced by different materials.**

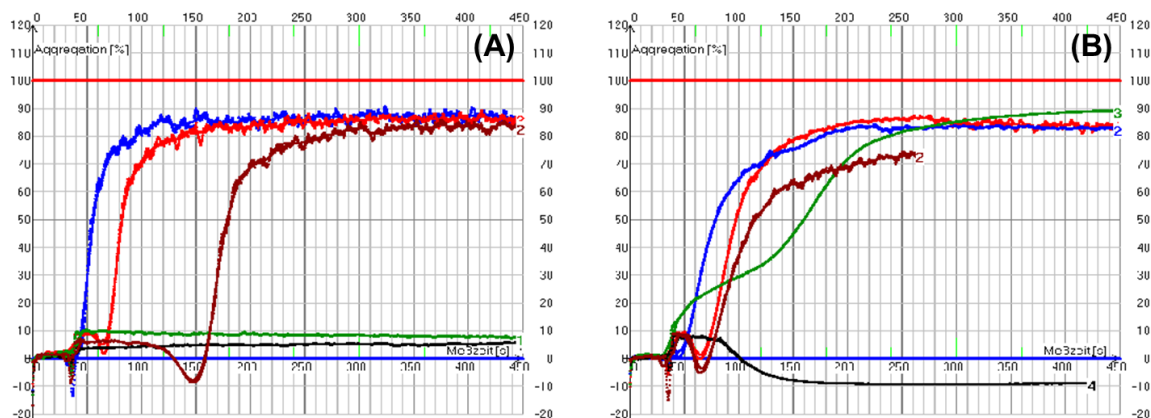

|                          | Platelet-rich plasma |               |               | Washed platelets    |               |               |
|--------------------------|----------------------|---------------|---------------|---------------------|---------------|---------------|
|                          | Max aggregation [%]  | Slope [%/min] | Lag Phase [s] | Max aggregation [%] | Slope [%/min] | Lag Phase [s] |
| ■ TRAP, 20 µg/ml         | 88.55                | 211.17        | 37.2          | 86.85               | 112.84        | 68.2          |
| ■ Horm Collagen, 5 µg/ml | 87.14                | 187.58        | 68.0          | 83.65               | 108.85        | 53.2          |
| ■ PLL                    | 9.94                 | 38.70         | 10.0          | 89.63               | 56.43         | 34.2          |
| ■ Collagen G, 5 µg/ml    | 6.29                 | 16.01         | 35.0          | 8.06                | 34.54         | 33.8          |
| ■ Collagen G, 100 µg/ml  | 84.97                | 156.53        | 157.8         | 73.53               | 88.86         | 67.6          |

(A) Platelet-rich plasma aggregated immediately after adding TRAP (blue) or 5 µg/ml Horm collagen (red), while no aggregates formed with 5 µg/ml collagen G (black). At 100 µg/ml, collagen G induced platelet aggregation (wine), but with a much longer lag time compared to 5 µg/ml Horm collagen. 100 µg/ml PLL (green) did not induce aggregation.

(B) Washed platelets aggregated immediately after adding TRAP (blue), or 5 µg/ml Horm collagen (red). Collagen G did not induce aggregation of washed platelets at 5 µg/ml (black), but induced aggregates at 100 µg/ml (wine). PLL (100 µg/ml) induced aggregation of washed platelets (green) but with much shorter lag phase and in a different way than TRAP and collagens did.

The table shows detail data points for maximum aggregation (%), speed/slope of aggregation (%/min), and lag phase (min).

**Supplementary Figure 3. Confocal laser scanning microscopy images of platelets loaded with  $\text{Ca}^{2+}$  indicator Fluo4-AM.**

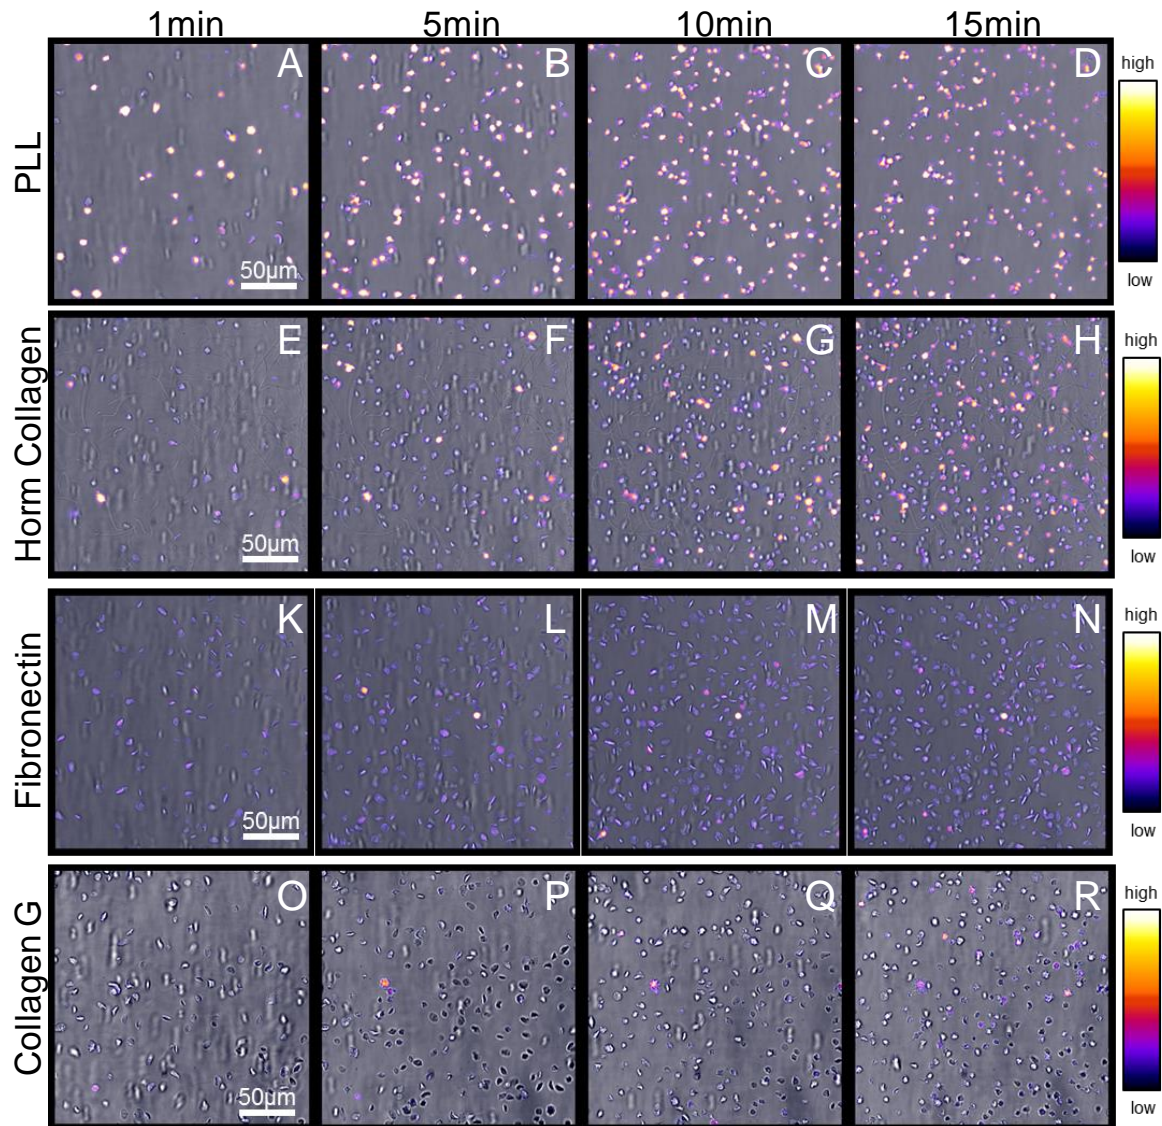

At any time point, highest calcium signaling level was from platelets on PLL (A-D), followed by Horm collagen (E-H), lower on fibronectin (K-N), and lowest on collagen G (O-R). Higher calcium signaling level indicates more activation and spreading of platelets.

**Supplementary Figure 4. Comparison of force- and work- histogram distributions obtained when platelets were immobilized on PLL.**

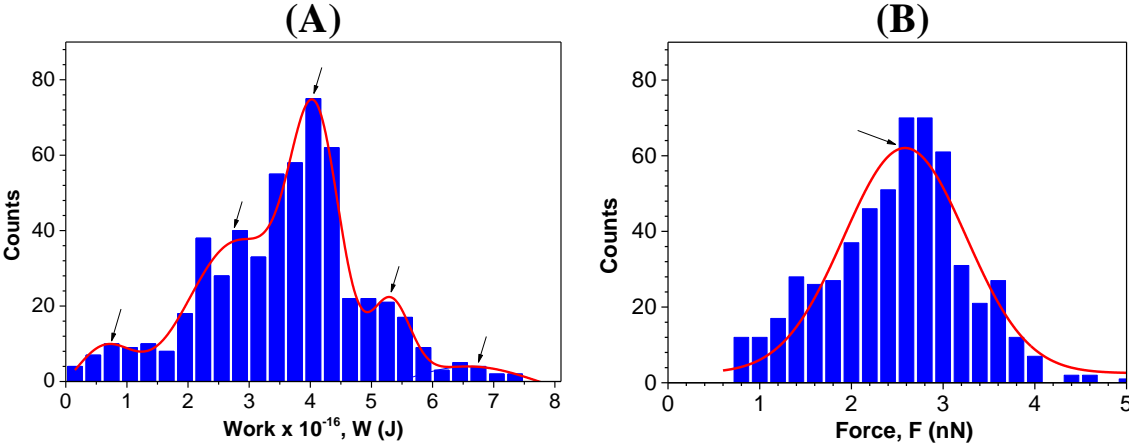

Multiple peaks (black arrows) can be clearly observed in the work histogram distribution (A), but not in the force histogram distribution (B).

**Supplementary Figure 5. Characteristics of material-passivated substrates.**

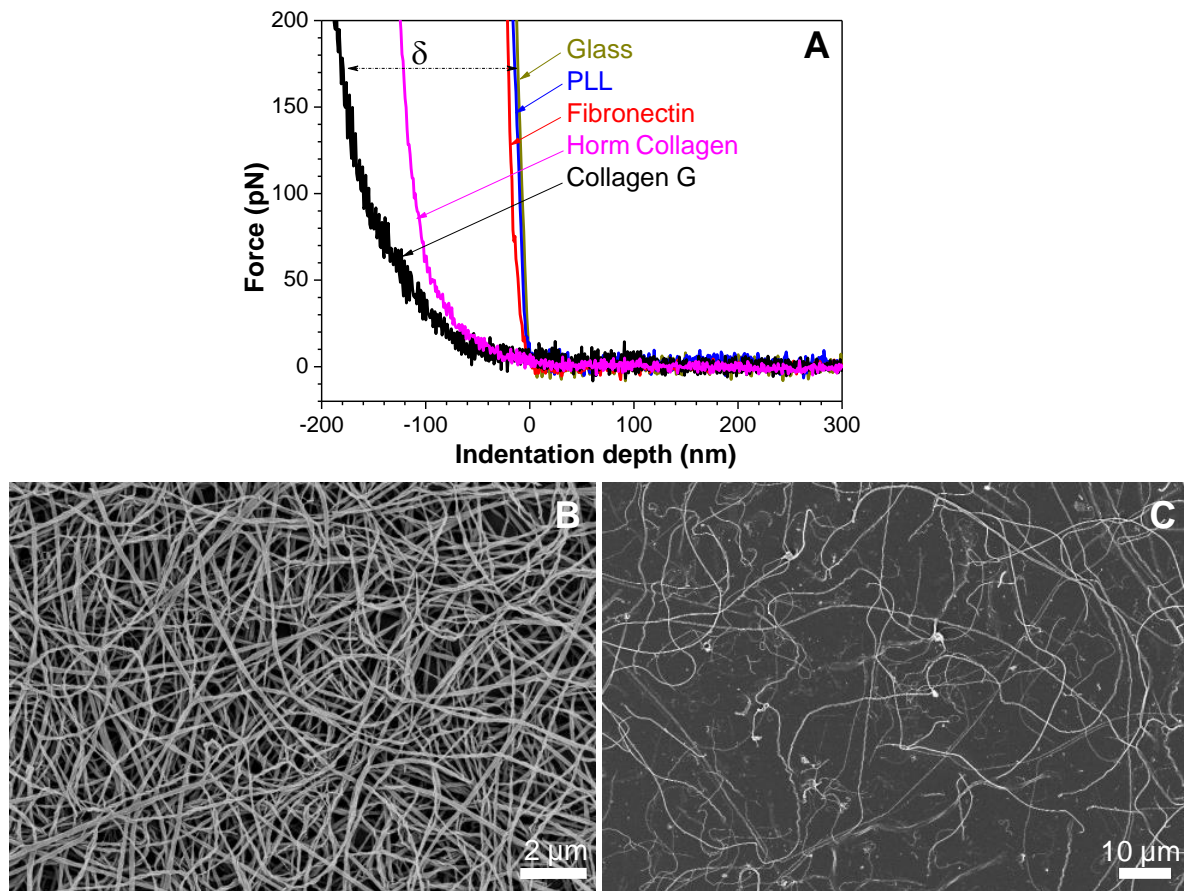

Stiffness of material-passivated surfaces measured by force-indentation method using a silica colloid probe. (A) Glass substrate (**dark yellow**) was used as a reference hard material for determination of the indentation depth ( $\sigma$ ) formed by other soft materials. No significant indentation depth was observed on PLL (**blue**) and fibronectin (**red**). Indentation depth was deeper on Horm collagen (**magenta**), and deepest on collagen G (**black**). Deeper indentation depth indicates that a thicker gel was formed on the substrate. The Young's modulus of the gel formed by collagen G was lower ( $E = 1.561 \pm 0.013$  kPa) than that of Horm collagen ( $E = 2.315 \pm 0.122$  kPa). The results indicate that a thick, but soft gel was formed by collagen G, a thinner and stiffer gel formed by Horm collagen, and much thinner layers were formed by fibronectin and PLL. SEM images also show that multiple layers were formed by collagen G (B) and thinner layers were formed by Horm collagen (C). Multiple layers formed by collagen G induced higher noise in the force-indentation curve as indicate by larger variation when the colloid probe was in contact with this layer. Horm collagen comprises fibers with different sizes, while collagen G consists of more uniform fibers.

**Supplementary Movie 1: Confocal laser scanning microscopy movie of platelets loaded with Ca<sup>2+</sup> indicator Fluo4-AM on PLL.**

**Supplementary Movie 2: Confocal laser scanning microscopy movie of platelets loaded with Ca<sup>2+</sup> indicator Fluo4-AM on Horn collagen.**

**Supplementary Movie 3: Confocal laser scanning microscopy movie of platelets loaded with Ca<sup>2+</sup> indicator Fluo4-AM on fibronectin.**

**Supplementary Movie 4: Confocal laser scanning microscopy movie of platelets loaded with Ca<sup>2+</sup> indicator Fluo4-AM on collagen G.**
